# Supplementary material
Source: publisher figshare collection journal article supplement (https://acs.figshare.com/ndownloader/files/4704109)
Supplement: Supplementary file 1 [file 4704109]

## Oxygen Reduction at Nanostructured Electrodes Assembled from Polyacrylate-capped Pt Nanoparticles in Polyelectrolyte

Zaki G Estephan, Leen Alawieh, and Lara I. Halaoui\*. Chemistry Department, American University of Beirut, Beirut 110236, Lebanon. \*Email: [lh07@aub.edu.lb](mailto:lh07@aub.edu.lb)

### Supporting Information:

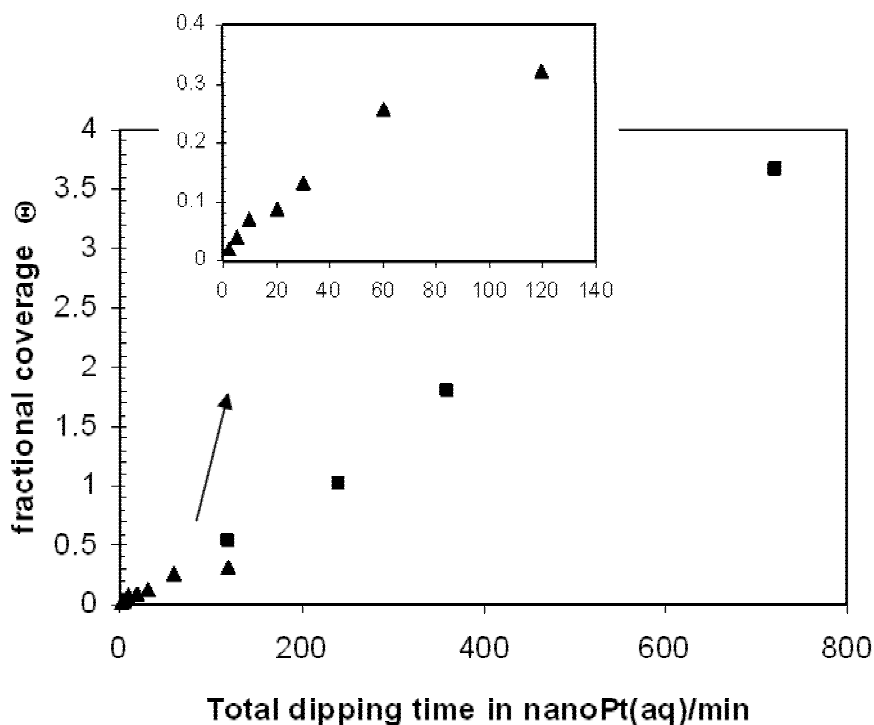

**Figure S1.** Estimated fractional coverage  $\theta = A_{\text{real}}/A_{\text{monolayer}}$  of Pt nanoparticles on the electrode surface vs. the total dipping time (in Pt nanoparticle solution): ■ for multilayers (60 min  $\equiv$  1 bilayer), and ▲ for 1 layer assembly.

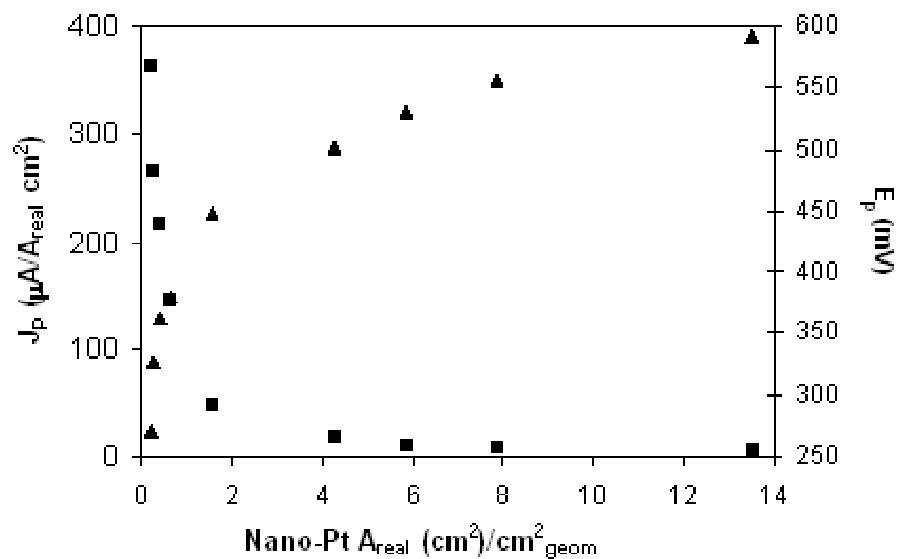

**Figure S2.** Peak current density (■) per real Pt surface area ( $A_{\text{real}}$ ) and  $E_p$  (▲, secondary axis) for oxygen reduction plotted vs. the real surface area for Pt nanoparticle assemblies on Glassy Carbon (GC) electrode, in air-saturated 1 M  $\text{H}_2\text{SO}_4$ . Data obtained from CVs acquired at 20 mV/s.
